# Supplementary material for: Modulated Electro-Hyperthermia Accelerates Tumor Delivery and Improves Anticancer Activity of Doxorubicin Encapsulated in Lyso-Thermosensitive Liposomes in 4T1-Tumor-Bearing Mice
Source: MDPI journal article supplement (doi:10.3390/ijms25063101), 2024-03-07
Supplement: s1 [file s1]

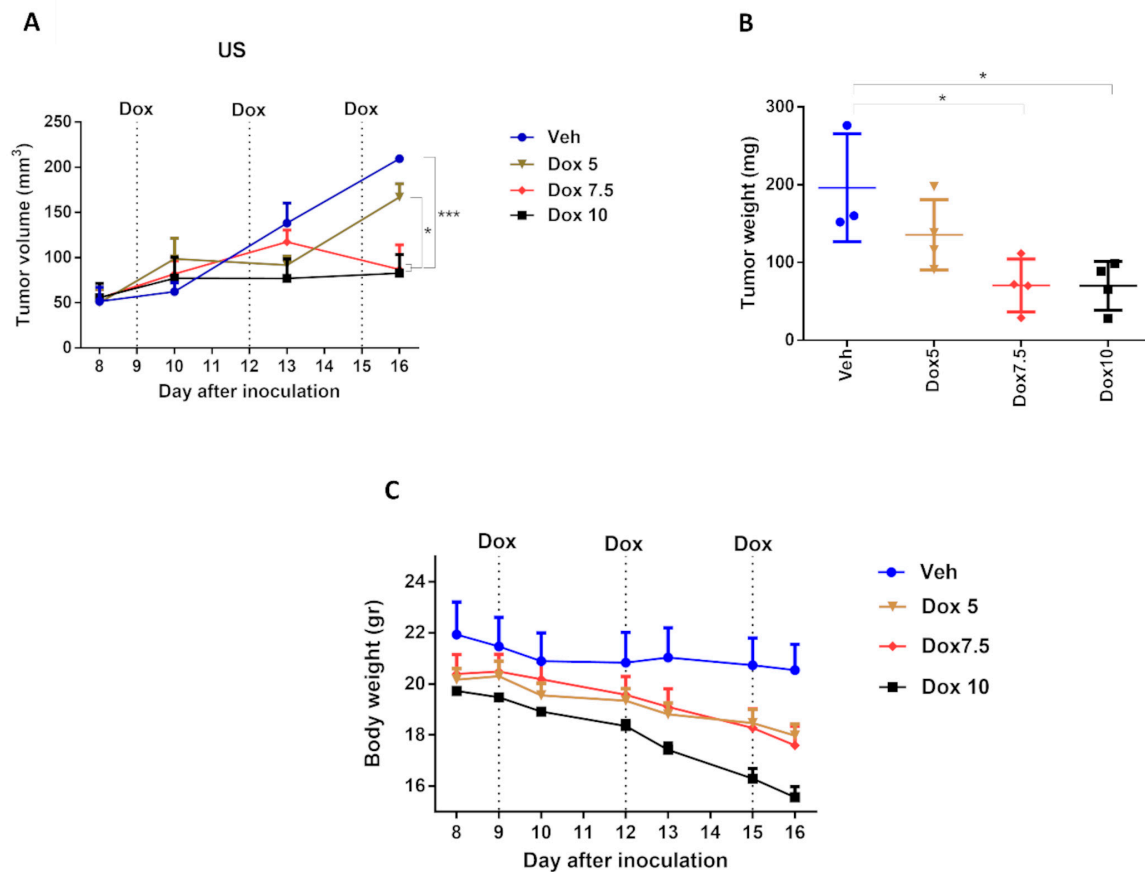

**Figure S1.** Effective and tolerated doses of DOX in 4T1-bearing mice after three treatments. Tumor volume by Ultrasound (US) (A). Tumor weight (B). Body weight change (C). Mean  $\pm$  SEM, (A, C) two-way ANOVA, (B) one-way ANOVA \*:  $p < 0.05$ , \*\*\*:  $p < 0.001$ .

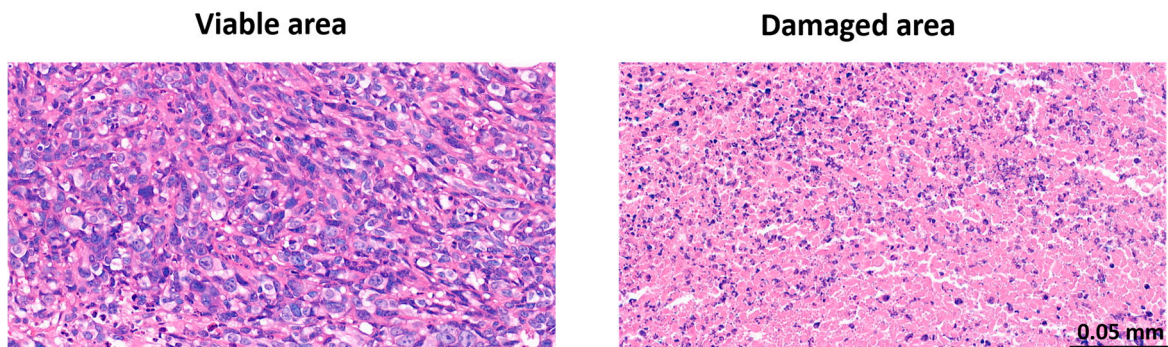

**Figure S2.** The difference between the viable and damaged areas on hematoxylin-eosin-stained sections.
